# Supplementary material for: Lateral graphene p–n junctions formed by the graphene/MoS2hybrid interface
Source: Royal Society of Chemistry journal article supplement (doi:10.1039/c5nr02552d), 2015-01-01
Supplement: c5nr02552d1.pdf [file c5nr02552d1.pdf]

## SUPPLEMENTARY INFORMATION

### **Lateral graphene p-n junctions formed by graphene/MoS<sub>2</sub> hybrid interface**

Jie Meng<sup>1</sup>, Hua-Ding Song<sup>1</sup>, Cai-Zhen Li<sup>1</sup>, Yibo Jin<sup>2</sup>, Lei Tang<sup>2</sup>, Dameng Liu<sup>3</sup>, Zhi-Min Liao<sup>1,4</sup>,  
Faxian Xiu<sup>2</sup> & Da-Peng Yu<sup>1,4</sup>

<sup>1</sup>State Key Laboratory for Mesoscopic Physics, Department of Physics, Peking University, Beijing  
100871, P.R. China

<sup>2</sup>State Key Laboratory of Surface Physics and Department of Physics, Fudan University, Shanghai  
200433, China

<sup>3</sup>State Key Laboratory of Tribology, Tsinghua University, Beijing 100084, China

<sup>4</sup>Collaborative Innovation Center of Quantum Matter, Beijing, China

Correspondence and requests for materials should be addressed to

Z.M.L. (email: liaozm@pku.edu.cn) or

F.X. (email: faxian@fudan.edu.cn) or

D.P.Y. (email: yudp@pku.edu.cn).

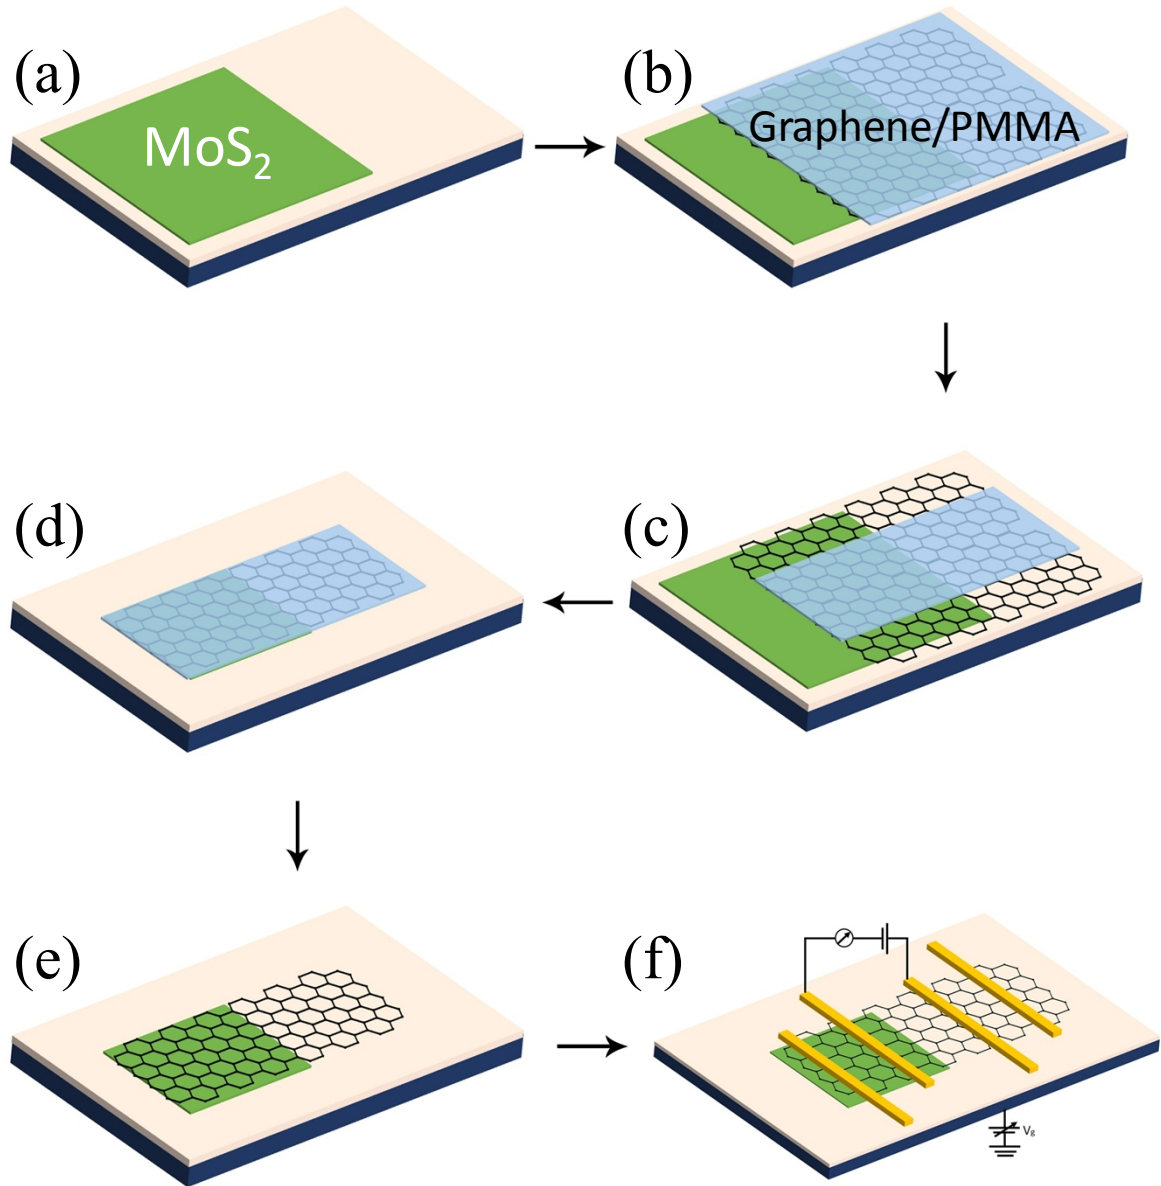

**Figure S1. Fabrication process of the devices.** (a) Monolayer MoS<sub>2</sub> grown by CVD method on Si/SiO<sub>2</sub> substrate. (b) Graphene/PMMA microstamp is transferred on MoS<sub>2</sub> by a site-specific transfer-printing method. Part of the graphene is on the MoS<sub>2</sub> and the other graphene portion is on the SiO<sub>2</sub> substrate. (c) To obtain appropriate structure for device fabrication, the PMMA is patterned by electron beam lithography (EBL) technique. (d) Excess parts of MoS<sub>2</sub> and graphene are removed by Plasma Etching technique. (e) PMMA layer is dissolved in acetone. (f) Deposition of Pd/Au electrodes by EBL, metal deposition, and lift off procedures.

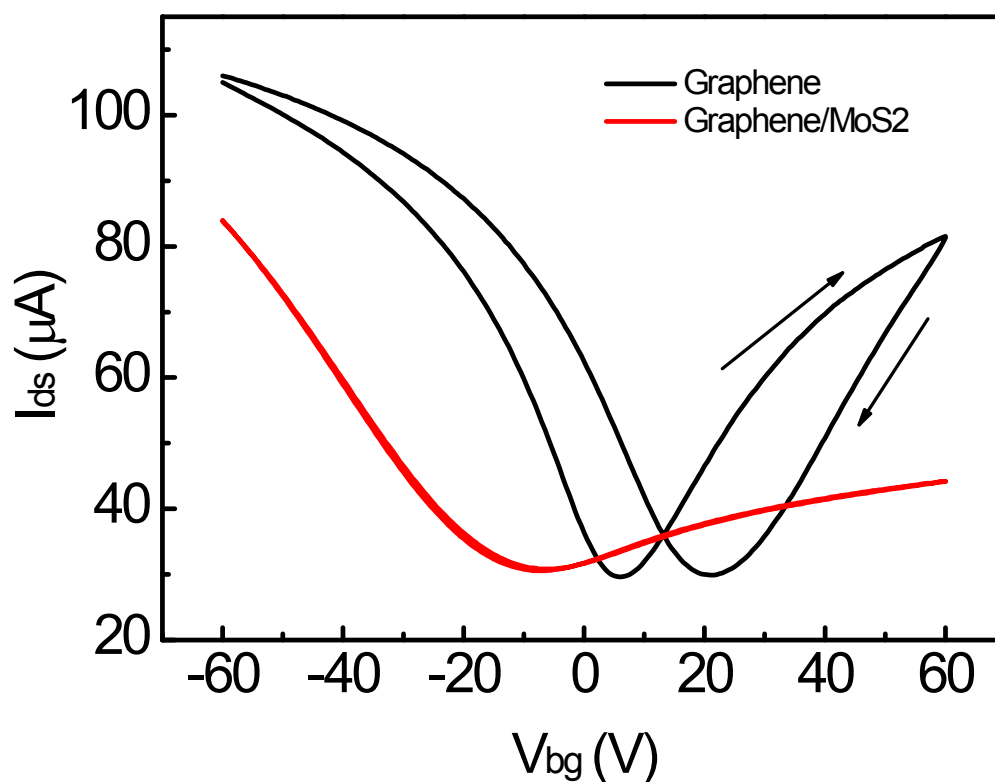

**Figure S2.** Figure S2. Transfer curves of the graphene/SiO<sub>2</sub> and graphene/MoS<sub>2</sub> field effect transistors. The back gate voltage was swept from -60 to 60 V, then back to -60 V immediately. The gate voltage sweeping rate is 0.5V/s at  $V_{ds}$ =50 mV. A clear hysteresis behavior is observed in graphene/SiO<sub>2</sub> region. Nevertheless, the graphene on MoS<sub>2</sub> does not show the similar hysteresis behavior. Compared to SiO<sub>2</sub> substrate, monolayer MoS<sub>2</sub> has better crystal structure with very few carrier trapping centers and gas molecular adsorption sites, which restrains the hysteresis behavior.

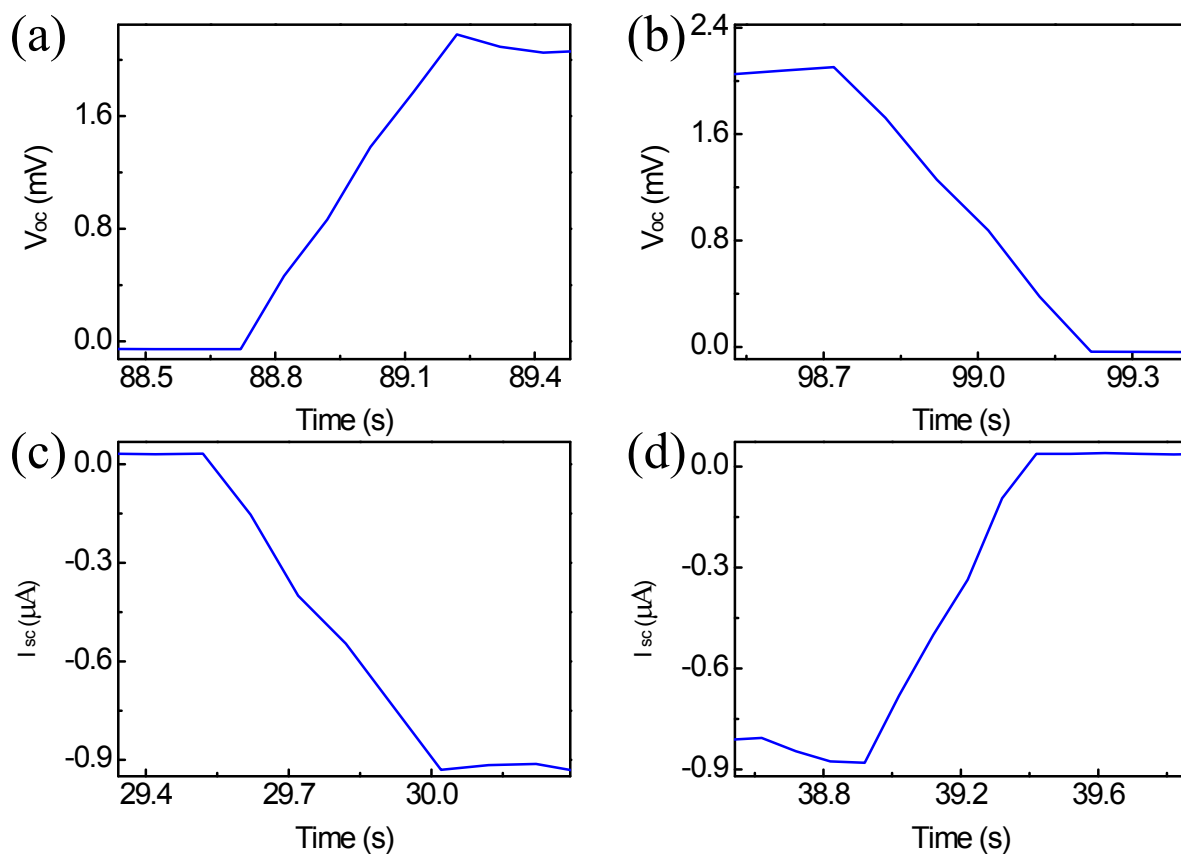

**Figure S3.** Zoom in the time scale of the photoresponse in Figures 3c and 3d to clearly show the rise and fall processes of the  $V_{OC}$  and  $I_{sc}$ .

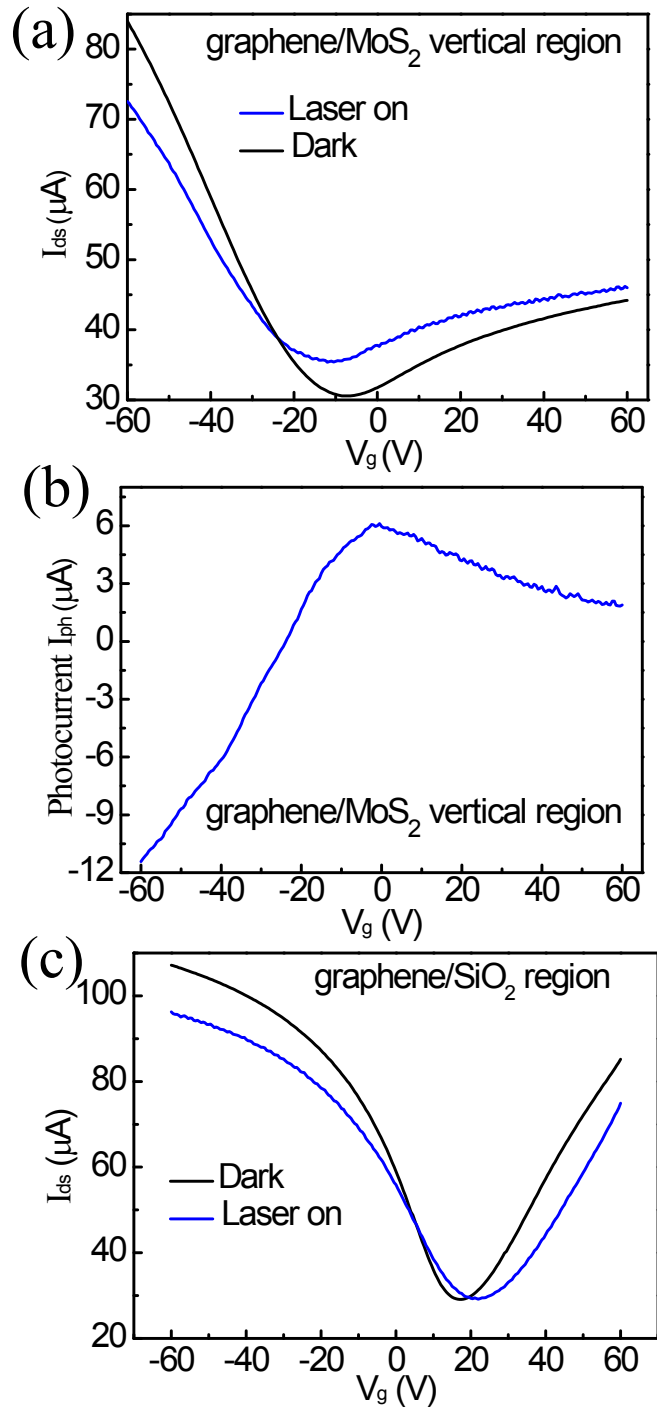

**Figure S4.** (a) Transfer curves of graphene/MoS<sub>2</sub> vertical region (electrodes D-C) with and without laser illumination near the graphene/electrode interface. (b) Photocurrent [ $I_{ph} = I_{ds}(\text{laser on}) - I_{ds}(\text{dark})$ ] obtained from the data in Figure S3a. The zero photocurrent point is introduced by metal-graphene interface as reported before. (c) Transfer curves of graphene/SiO<sub>2</sub> region (electrodes A-B) with and without illumination.

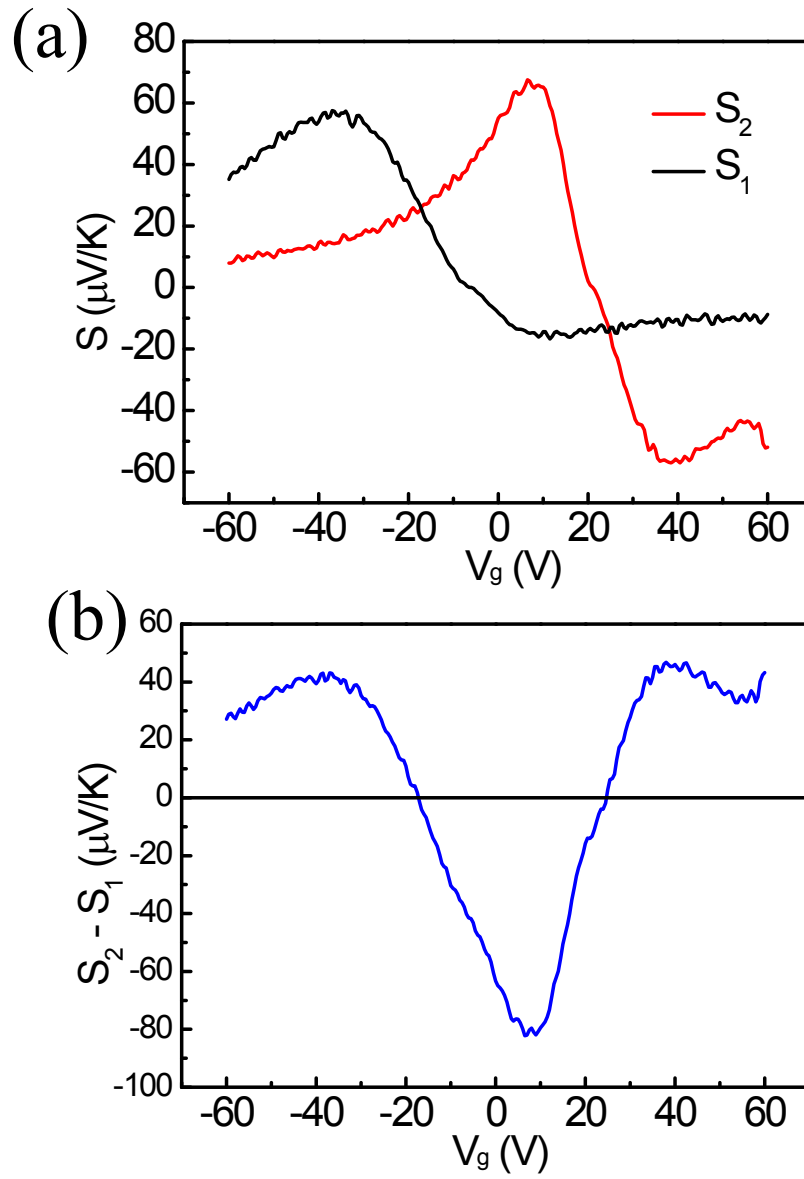

**Figure S5.** (a) Seebeck coefficients of the graphene on  $\text{SiO}_2$  and  $\text{MoS}_2$  as sweeping gate voltage. (b) Evolution of the difference of the Seebeck coefficients under gate voltage modulation.
